# Supplementary material
Source: PubMed Central journal article supplement (PMC8259631)
Supplement: ASN.2021010009SupplementaryData.pdf [file ASN.2021010009SupplementaryData.pdf]

## **Supplemental Material**

Supplementary Table 1. Weekly rates of COVID-19 hospitalization during epidemiologic weeks 8-27 of 2020, by five-week intervals, among dialysis patients with Medicare coverage.

Supplementary Table 2. Weekly rates of death during epidemiologic weeks 3-27 of 2017-2020 among all ESKD patients undergoing dialysis.

Supplementary Table 3. Weekly rates of death during epidemiologic weeks 3-27 of 2017-2020 among all ESKD patients with a functioning transplant.

Supplementary Table 4. Weekly rates of non-COVID-19 hospitalization during epidemiologic weeks 3-27 of 2017-2020 among dialysis patients with Medicare coverage.

Supplementary Figure 1. Per-interval relative rates of death during epidemiologic weeks 13-27 of 2020 versus 2017-2019 among all ESKD patients undergoing dialysis and per-interval ratios of observed versus expected deaths in the general population, stratified by state.

Supplementary Figure 2. Relative rates of death during epidemiologic weeks 13-27 of 2020 versus 2017-2019 among all ESKD patients with a functioning transplant and ratios of observed versus expected deaths in the general population, by state.

Supplementary Table 1. Weekly rates of COVID-19 hospitalization during epidemiologic weeks 8-27 of 2020, by five-week intervals, among dialysis patients with Medicare coverage.

|                     | Weeks 8-12 | Weeks 13-17 | Weeks 18-22 | Weeks 23-27 |
|---------------------|------------|-------------|-------------|-------------|
| All patients        | 0.21       | 3.33        | 2.21        | 1.77        |
| Age (years)         |            |             |             |             |
| 18-44               | 0.15       | 1.62        | 1.24        | 1.57        |
| 45-64               | 0.19       | 2.84        | 1.98        | 1.88        |
| 65-74               | 0.21       | 3.86        | 2.54        | 1.80        |
| 75+                 | 0.26       | 4.39        | 2.67        | 1.63        |
| Race/ethnicity      |            |             |             |             |
| Non-Hispanic White  | 0.11       | 2.33        | 1.68        | 1.10        |
| Non-Hispanic Black  | 0.33       | 4.65        | 2.81        | 1.86        |
| Hispanic            | 0.18       | 3.44        | 2.51        | 3.59        |
| Asian               | 0.31       | 3.45        | 1.48        | 0.94        |
| Other/unknown       | 0.12       | 2.33        | 2.35        | 2.09        |
| Sex                 |            |             |             |             |
| Female              | 0.20       | 3.31        | 2.34        | 1.95        |
| Male                | 0.21       | 3.35        | 2.11        | 1.63        |
| Dialysis modality   |            |             |             |             |
| Hemodialysis        | 0.22       | 3.59        | 2.38        | 1.90        |
| Peritoneal dialysis | 0.10       | 0.98        | 0.68        | 0.62        |

Note: Rate statistics indicate hospitalizations per 1000 patients per week.

Supplementary Table 2. Weekly rates of death during epidemiologic weeks 3-27 of 2017-2020 among all ESKD patients undergoing dialysis.

|                    | Weeks 3-7 |      | Weeks 8-12 |      | Weeks 13-17 |      | Weeks 18-22 |      | Weeks 23-27 |      |
|--------------------|-----------|------|------------|------|-------------|------|-------------|------|-------------|------|
|                    | 2017-2019 | 2020 | 2017-2019  | 2020 | 2017-2019   | 2020 | 2017-2019   | 2020 | 2017-2019   | 2020 |
| All patients       | 3.25      | 3.17 | 3.07       | 3.13 | 2.93        | 3.85 | 2.77        | 3.24 | 2.69        | 3.00 |
| Age (years)        |           |      |            |      |             |      |             |      |             |      |
| 18-44              | 1.05      | 1.14 | 1.02       | 1.11 | 1.01        | 1.38 | 0.95        | 1.18 | 0.93        | 1.07 |
| 45-64              | 2.19      | 2.19 | 2.10       | 2.14 | 1.99        | 2.81 | 1.92        | 2.26 | 1.85        | 2.12 |
| 65-74              | 3.79      | 3.64 | 3.55       | 3.60 | 3.38        | 4.32 | 3.25        | 3.73 | 3.14        | 3.44 |
| ≥75                | 5.92      | 5.51 | 5.54       | 5.46 | 5.30        | 6.50 | 4.90        | 5.56 | 4.76        | 5.14 |
| Race/ethnicity     |           |      |            |      |             |      |             |      |             |      |
| Non-Hispanic White | 4.45      | 4.34 | 4.18       | 4.23 | 3.99        | 4.52 | 3.74        | 4.07 | 3.65        | 3.88 |
| Non-Hispanic Black | 2.51      | 2.51 | 2.41       | 2.61 | 2.35        | 3.78 | 2.20        | 2.92 | 2.15        | 2.63 |
| Hispanic           | 2.32      | 2.39 | 2.17       | 2.16 | 2.03        | 2.91 | 1.97        | 2.42 | 1.90        | 2.36 |
| Asian              | 2.47      | 2.42 | 2.33       | 2.60 | 2.16        | 3.50 | 1.97        | 2.61 | 1.88        | 1.83 |
| Other/unknown      | 2.95      | 2.23 | 2.75       | 2.31 | 2.55        | 3.02 | 2.68        | 2.65 | 2.42        | 2.34 |
| Sex                |           |      |            |      |             |      |             |      |             |      |
| Female             | 3.30      | 3.25 | 3.13       | 3.17 | 2.99        | 3.78 | 2.85        | 3.30 | 2.74        | 3.09 |
| Male               | 3.21      | 3.12 | 3.02       | 3.10 | 2.88        | 3.89 | 2.71        | 3.19 | 2.65        | 2.94 |

Note: Rate statistics indicate deaths per 1000 patients per week.

Supplementary Table 3. Weekly rates of death during epidemiologic weeks 3-27 of 2017-2020 among all ESKD patients with a functioning transplant.

|                    | Weeks 3-7 |      | Weeks 8-12 |      | Weeks 13-17 |      | Weeks 18-22 |      | Weeks 23-27 |      |
|--------------------|-----------|------|------------|------|-------------|------|-------------|------|-------------|------|
|                    | 2017-2019 | 2020 | 2017-2019  | 2020 | 2017-2019   | 2020 | 2017-2019   | 2020 | 2017-2019   | 2020 |
| All patients       | 0.61      | 0.64 | 0.62       | 0.60 | 0.61        | 0.93 | 0.56        | 0.71 | 0.54        | 0.64 |
| Age (years)        |           |      |            |      |             |      |             |      |             |      |
| 18-44              | 0.13      | 0.15 | 0.13       | 0.10 | 0.16        | 0.23 | 0.12        | 0.16 | 0.13        | 0.15 |
| 45-64              | 0.45      | 0.44 | 0.45       | 0.42 | 0.42        | 0.68 | 0.38        | 0.49 | 0.37        | 0.44 |
| 65-74              | 1.03      | 0.97 | 1.04       | 0.91 | 0.99        | 1.44 | 0.94        | 1.14 | 0.86        | 1.03 |
| ≥75                | 1.96      | 2.15 | 1.97       | 2.10 | 2.07        | 2.82 | 1.91        | 2.28 | 1.90        | 1.98 |
| Race               |           |      |            |      |             |      |             |      |             |      |
| Non-Hispanic White | 0.62      | 0.69 | 0.62       | 0.69 | 0.62        | 0.86 | 0.60        | 0.71 | 0.55        | 0.62 |
| Non-Hispanic Black | 0.55      | 0.59 | 0.55       | 0.56 | 0.56        | 1.29 | 0.46        | 0.80 | 0.47        | 0.73 |
| Hispanic           | 0.38      | 0.57 | 0.39       | 0.47 | 0.39        | 0.85 | 0.35        | 0.66 | 0.37        | 0.67 |
| Asian              | 0.29      | 0.41 | 0.36       | 0.41 | 0.42        | 0.51 | 0.30        | 0.47 | 0.41        | 0.62 |
| Other/unknown      | 1.04      | 0.66 | 1.10       | 0.52 | 0.96        | 0.85 | 0.90        | 0.74 | 0.84        | 0.56 |
| Sex                |           |      |            |      |             |      |             |      |             |      |
| Female             | 0.56      | 0.58 | 0.57       | 0.55 | 0.55        | 0.83 | 0.55        | 0.62 | 0.52        | 0.61 |
| Male               | 0.65      | 0.68 | 0.66       | 0.63 | 0.64        | 0.99 | 0.57        | 0.77 | 0.55        | 0.66 |

Note: Rate statistics indicate deaths per 1000 patients per week.

Supplementary Table 4. Weekly rates of non-COVID-19 hospitalization during epidemiologic weeks 3-27 of 2017-2020 among dialysis patients with Medicare coverage.

|                     | Weeks 3-7 |      | Weeks 8-12 |      | Weeks 13-17 |      | Weeks 18-22 |      | Weeks 23-27 |      |
|---------------------|-----------|------|------------|------|-------------|------|-------------|------|-------------|------|
|                     | 2017-2019 | 2020 | 2017-2019  | 2020 | 2017-2019   | 2020 | 2017-2019   | 2020 | 2017-2019   | 2020 |
| All patients        | 34.7      | 34.3 | 33.8       | 32.3 | 32.8        | 21.9 | 32.2        | 25.2 | 31.9        | 27.2 |
| Age (years)         |           |      |            |      |             |      |             |      |             |      |
| 18-44               | 35.5      | 37.0 | 35.1       | 34.1 | 34.4        | 24.3 | 34.4        | 27.5 | 34.4        | 30.9 |
| 45-64               | 33.4      | 33.0 | 32.6       | 31.3 | 31.5        | 21.5 | 31.3        | 24.8 | 31.0        | 26.9 |
| 65-74               | 35.2      | 34.4 | 34.3       | 32.8 | 33.4        | 22.1 | 32.5        | 25.7 | 32.0        | 27.1 |
| ≥75                 | 36.0      | 35.0 | 34.7       | 32.7 | 33.5        | 21.2 | 32.4        | 23.9 | 32.0        | 26.2 |
| Race/ethnicity      |           |      |            |      |             |      |             |      |             |      |
| Non-Hispanic White  | 37.6      | 36.6 | 36.3       | 34.6 | 35.3        | 23.5 | 34.5        | 27.5 | 34.0        | 29.6 |
| Non-Hispanic Black  | 34.1      | 34.2 | 33.3       | 32.2 | 32.5        | 22.1 | 32.2        | 25.0 | 31.9        | 27.6 |
| Hispanic            | 31.8      | 31.8 | 31.0       | 29.9 | 30.0        | 19.6 | 29.3        | 22.2 | 29.3        | 23.6 |
| Asian               | 24.8      | 24.0 | 24.4       | 23.6 | 23.8        | 15.4 | 23.4        | 17.5 | 23.1        | 18.2 |
| Other/unknown       | 31.9      | 30.2 | 31.6       | 28.4 | 30.3        | 19.1 | 29.4        | 21.5 | 28.6        | 22.9 |
| Sex                 |           |      |            |      |             |      |             |      |             |      |
| Female              | 37.3      | 37.0 | 36.3       | 34.3 | 35.2        | 23.0 | 34.7        | 26.8 | 34.2        | 29.1 |
| Male                | 32.6      | 32.1 | 31.7       | 30.8 | 30.9        | 21.1 | 30.2        | 23.9 | 30.0        | 25.7 |
| Dialysis modality   |           |      |            |      |             |      |             |      |             |      |
| Hemodialysis        | 35.3      | 34.9 | 34.3       | 32.8 | 33.3        | 22.2 | 32.7        | 25.4 | 32.3        | 27.4 |
| Peritoneal dialysis | 28.4      | 28.7 | 28.0       | 28.1 | 27.7        | 19.1 | 27.5        | 23.0 | 27.5        | 25.2 |

Note: Rate statistics indicate hospitalizations per 1000 patients per week.

Supplementary Figure 1. Per-interval relative rates of death during epidemiologic weeks 13-27 of 2020 versus 2017-2019 among all ESKD patients undergoing dialysis and per-interval ratios of observed versus expected deaths in the general population, stratified by state.

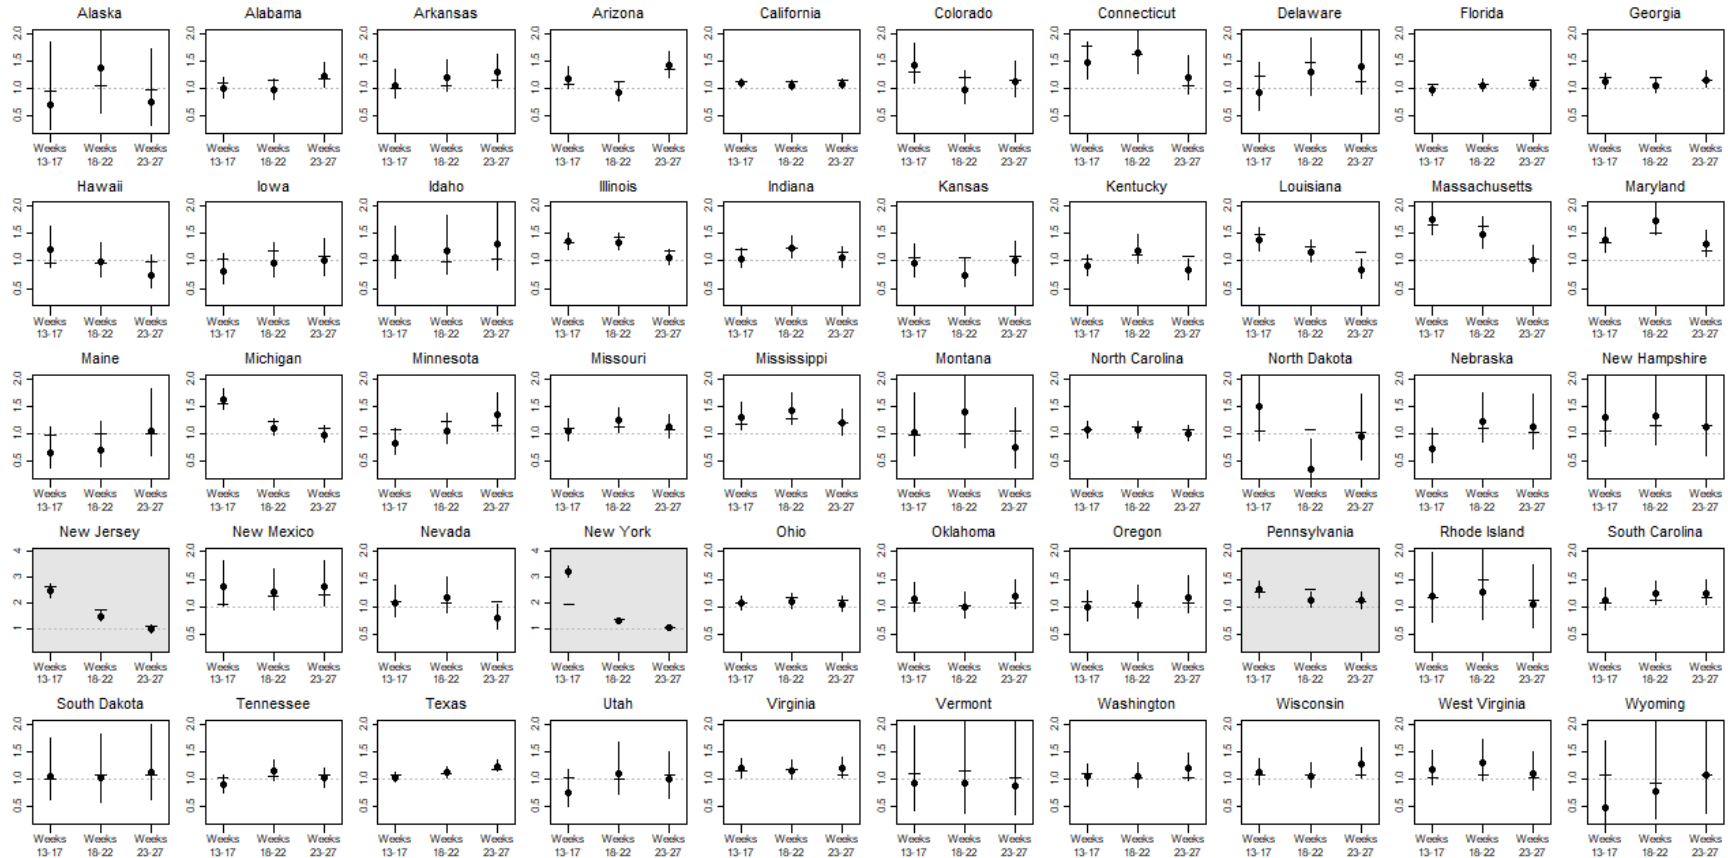

Note: Excess mortality in the general population was ascertained from the NCHS. Relative rates of death among all ESKD patients undergoing dialysis and corresponding 95% confidence intervals are depicted with points and vertical bars, whereas ratios of observed versus expected deaths in the general population are depicted with horizontal bars.

Supplementary Figure 2. Relative rates of death during epidemiologic weeks 13-27 of 2020 versus 2017-2019 among all ESKD patients with a functioning transplant and ratios of observed versus expected deaths in the general population, by state.

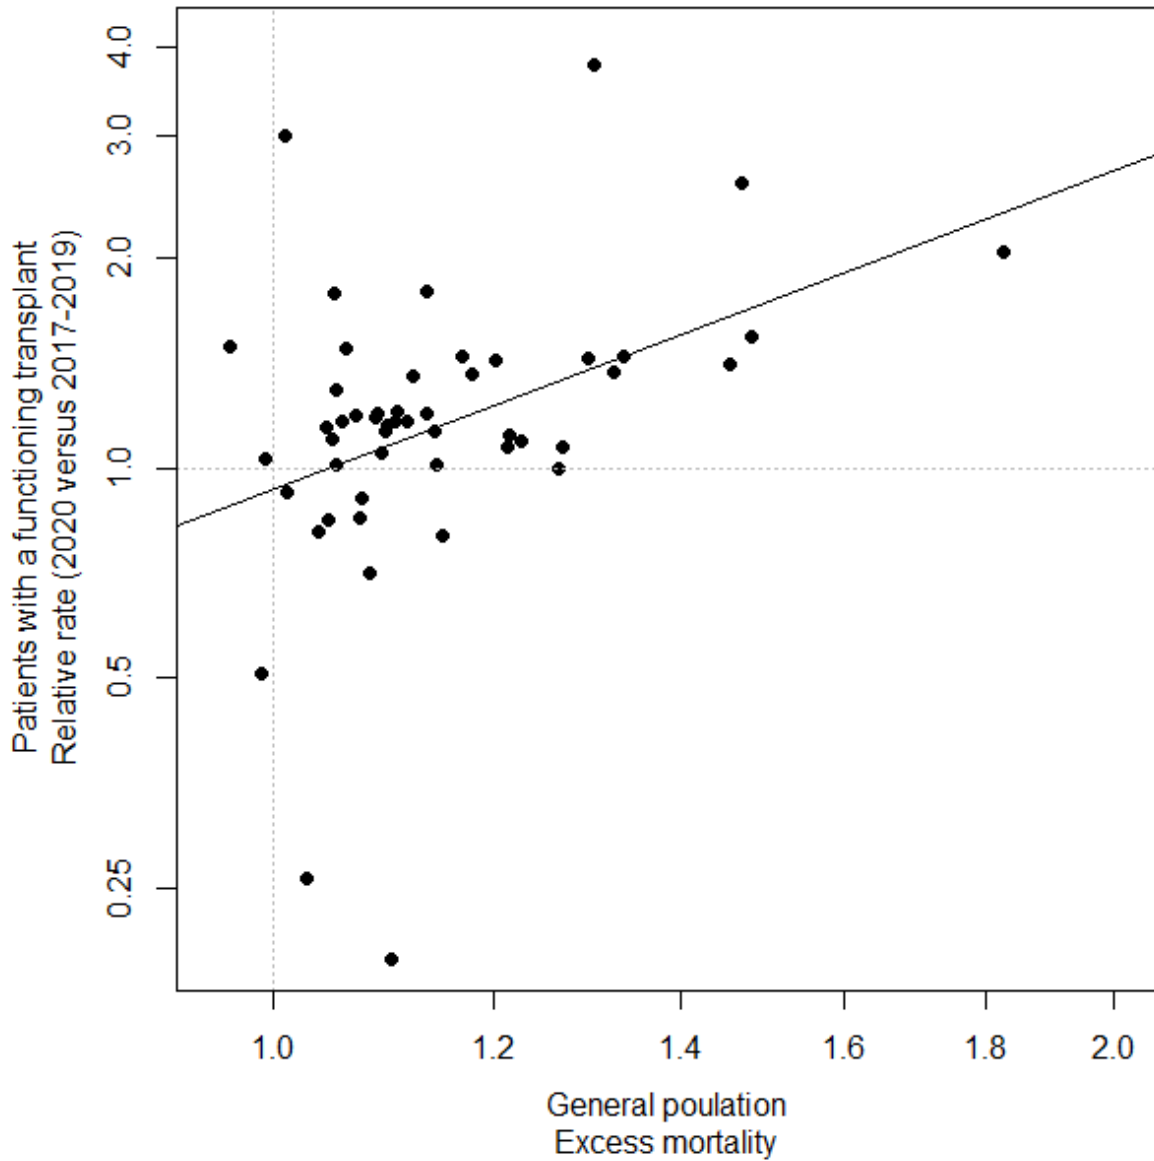

Note: Excess mortality in the general population was ascertained from the NCHS. Each state is depicted by a point. The solid line displays a linear regression of log-transformed relative rates of



death among patients with a functioning transplant on log-transformed excess mortality in the general population.
